# Supplementary material for: The protocatechuic acid-based deep eutectic solvent-mediated green synthesis of 1,2,4,5-tetrasubstituted imidazoles
Source: Royal Society of Chemistry journal article supplement (doi:10.1039/d4ra03302g), 2024-01-01

## Supporting Information

(RSC Advances)

### The protocatechuic acid-based deep eutectic solvent-mediated green synthesis of 1,2,4,5-tetrasubstituted imidazoles

Hadis Goudarzi, Davood Habibi\*, Arezo Monem

Department of Organic Chemistry, Faculty of Chemistry and Petroleum Chemistry, Bu-Ali Sina University, Hamedan 6517838683, Iran

\*Corresponding author email: davood.habibi@gmail.com (& dhabibi@basu.ac.ir), Tel: +98 81 38380922; Fax: +98 81 31408025

| <b>Content</b>                      | <b>Page</b> |
|-------------------------------------|-------------|
| FT-IR spectrum of a1                | 3           |
| <sup>1</sup> H NMR spectrum of a1   | 3           |
| <sup>13</sup> C NMR spectrum of a1  | 4           |
| Mass spectrum of a1                 | 4           |
| FT-IR spectrum of a2                | 5           |
| <sup>1</sup> H NMR spectrum of a2   | 5           |
| <sup>13</sup> C NMR spectrum of a2  | 6           |
| Mass spectrum of a2                 | 6           |
| FT-IR spectrum of a3                | 7           |
| <sup>1</sup> H NMR spectrum of a3   | 7           |
| <sup>13</sup> C NMR spectrum of a3  | 8           |
| Mass spectrum of a3                 | 8           |
| FT-IR spectrum of a4                | 9           |
| <sup>1</sup> H NMR spectrum of a4   | 9           |
| <sup>13</sup> C NMR spectrum of a4  | 10          |
| Mass spectrum of a4                 | 10          |
| FT-IR spectrum of a5                | 11          |
| <sup>1</sup> H NMR spectrum of a5   | 11          |
| <sup>13</sup> C NMR spectrum of a5  | 12          |
| Mass spectrum of a5                 | 12          |
| FT-IR spectrum of a6                | 13          |
| FT-IR spectrum of a7                | 13          |
| FT-IR spectrum of a8                | 13          |
| <sup>1</sup> H NMR spectrum of a8   | 14          |
| FT-IR spectrum of a9                | 14          |
| <sup>1</sup> H NMR spectrum of a9   | 15          |
| FT-IR spectrum of a10               | 15          |
| FT-IR spectrum of a11               | 16          |
| <sup>1</sup> H NMR spectrum of a11  | 16          |
| <sup>13</sup> C NMR spectrum of a11 | 17          |
| FT-IR spectrum of a12               | 17          |

FT-IR spectrum of 2-(3-nitrophenyl)-1-phenyl-1H-phenanthro[9,10-d]imidazole (**a1**):

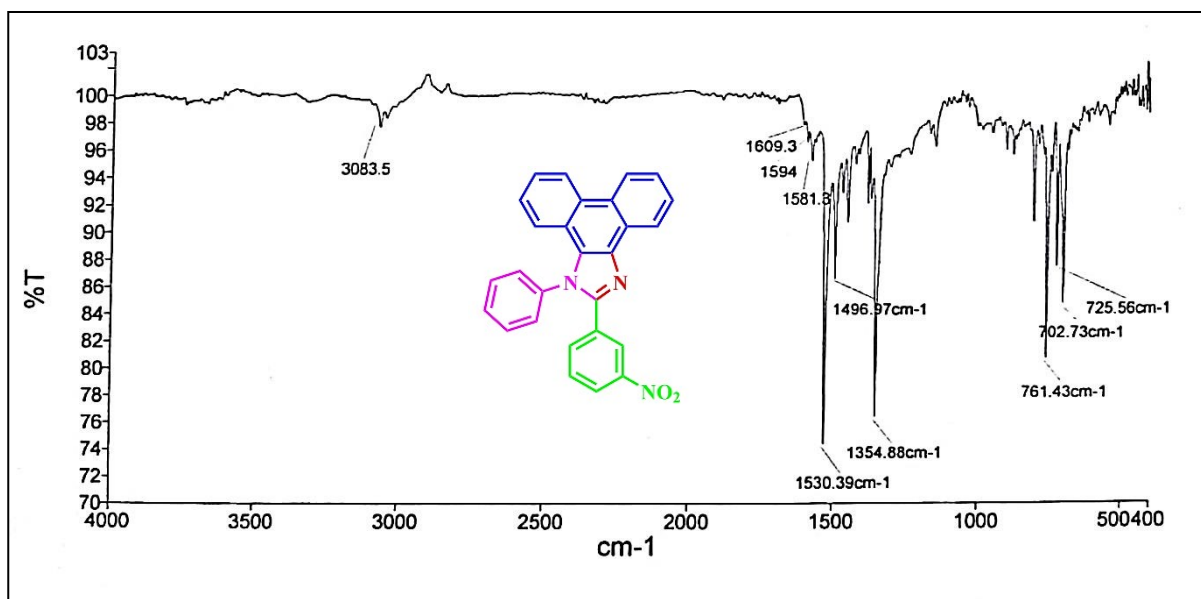

$^1\text{H}$ NMR spectrum of 2-(3-nitrophenyl)-1-phenyl-1H-phenanthro[9,10-d]imidazole (**a1**):

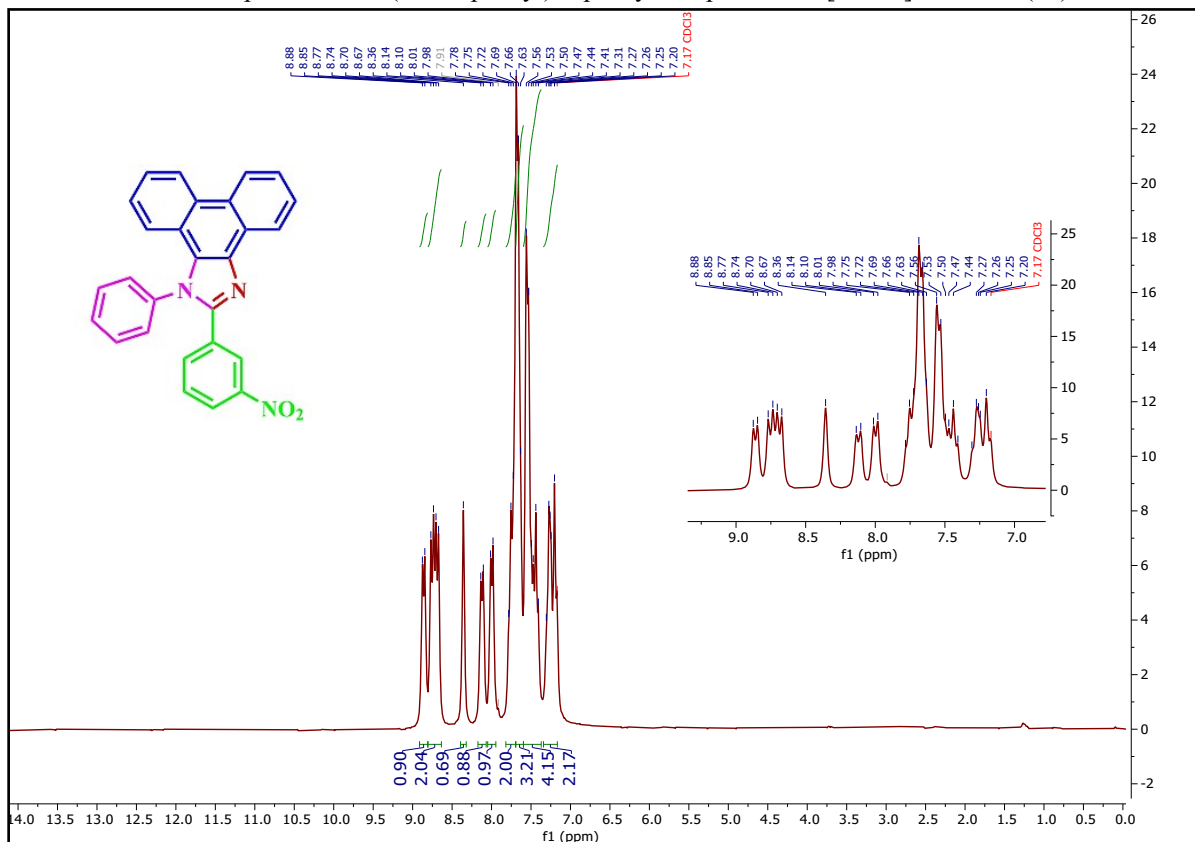

$^{13}\text{C}$ NMR spectrum of 2-(3-nitrophenyl)-1-phenyl-1H-phenanthro[9,10-d]imidazole (**a1**):

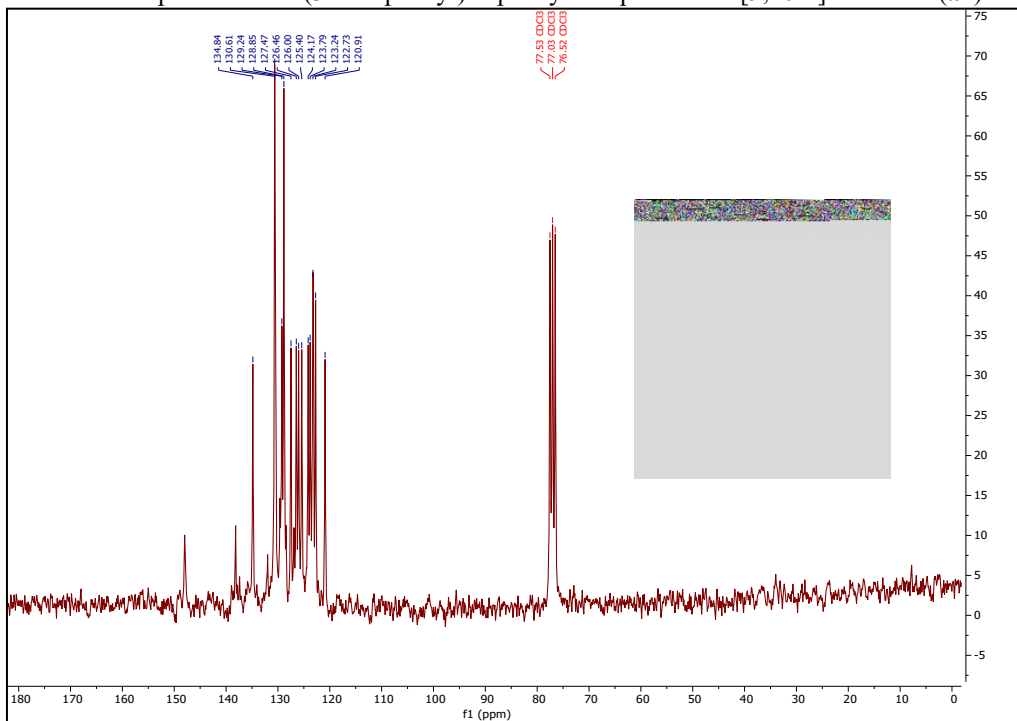

Mass spectrum of 2-(3-nitrophenyl)-1-phenyl-1H-phenanthro[9,10-d]imidazole (**a1**):

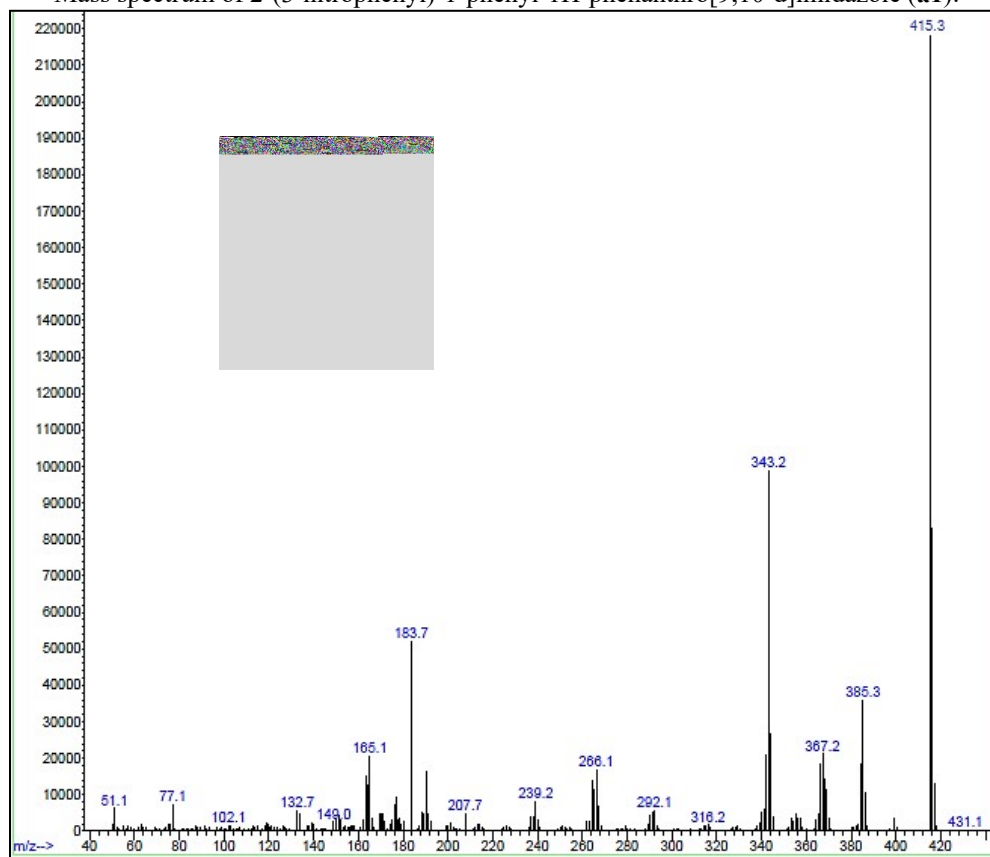

FT-IR spectrum of 1-(4-chlorophenyl)-2-(4-isopropylphenyl)-1H-phenanthro[9,10-d]imidazole (**a2**):

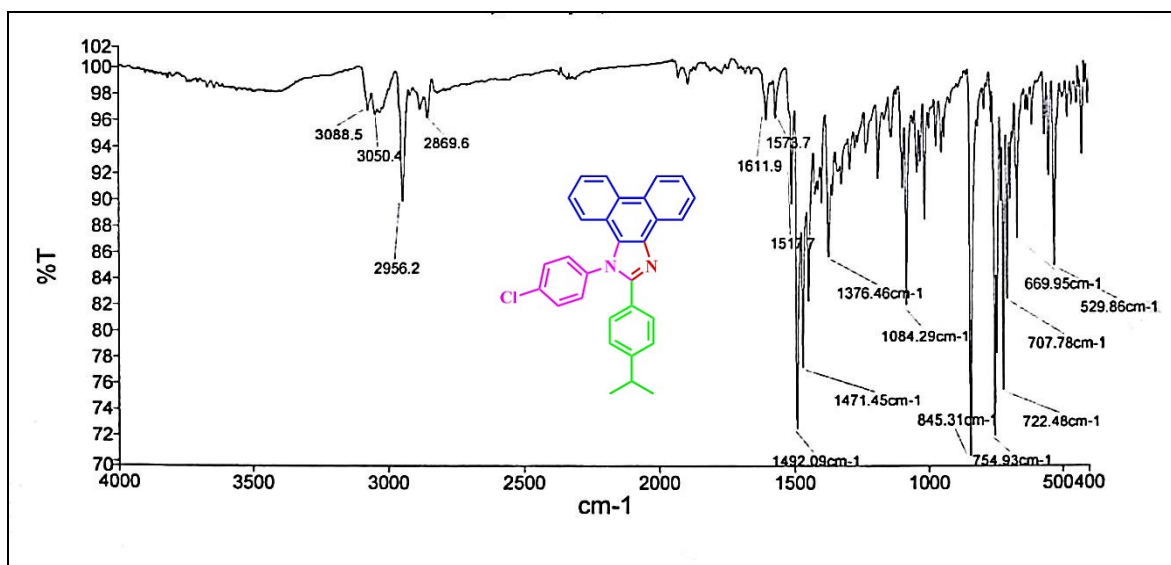

<sup>1</sup>H NMR spectrum of 1-(4-chlorophenyl)-2-(4-isopropylphenyl)-1H-phenanthro[9,10-d]imidazole (**a2**):

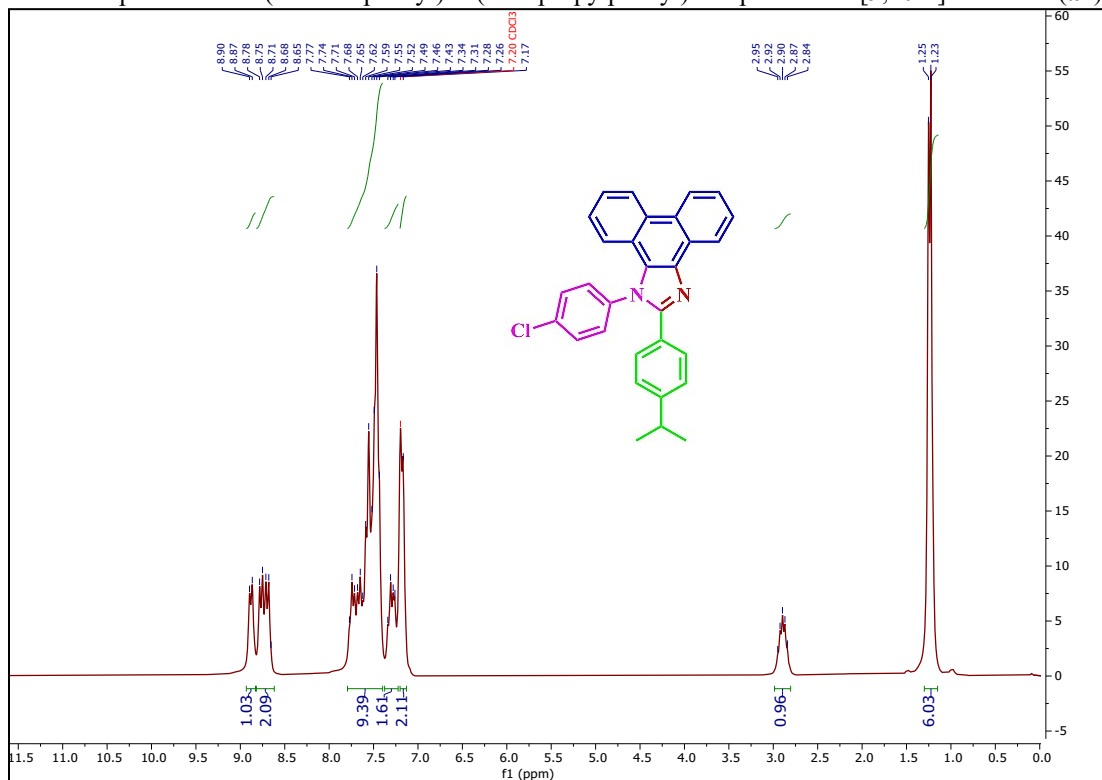

$^{13}\text{C}$ NMR spectrum of 1-(4-chlorophenyl)-2-(4-isopropylphenyl)-1H-phenanthro[9,10-d]imidazole (**a2**):

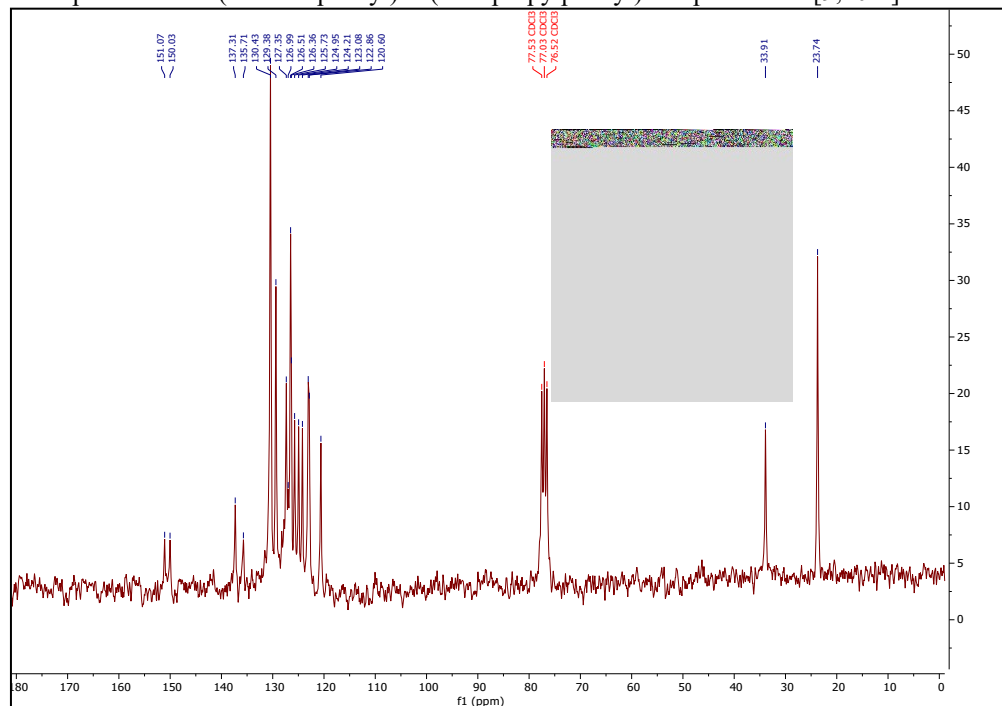

Mass spectrum of 1-(4-chlorophenyl)-2-(4-isopropylphenyl)-1H-phenanthro[9,10-d]imidazole (**a2**):

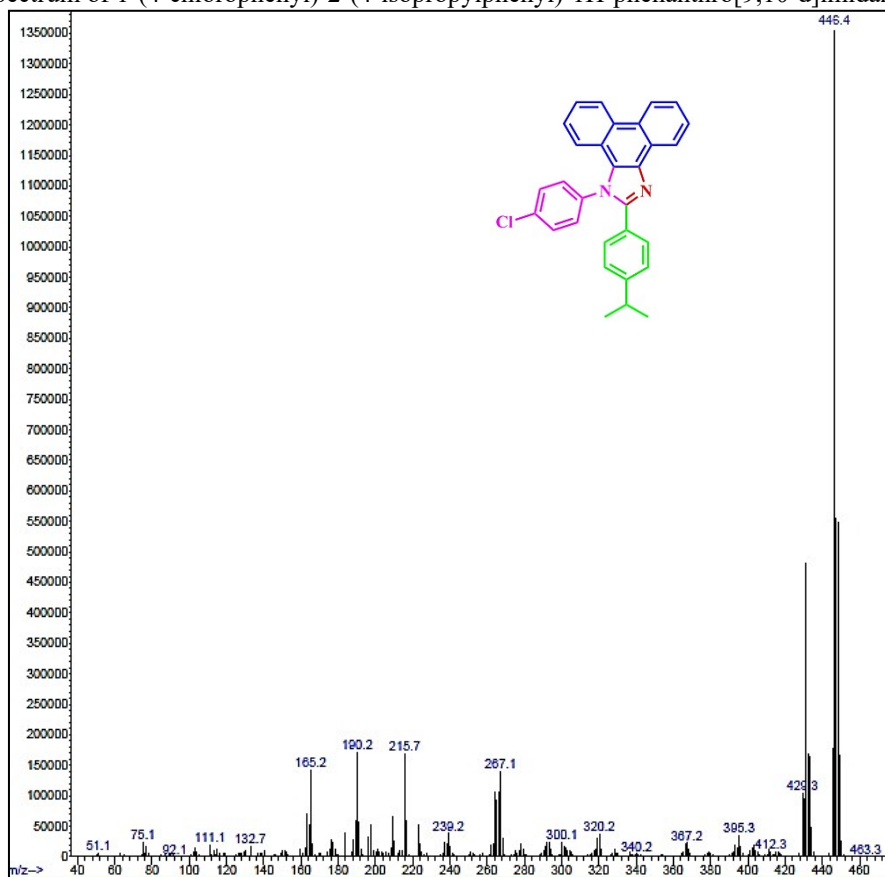

FT-IR spectrum of 1-(4-chlorophenyl)-2-(3-nitrophenyl)-1H-phenanthro[9,10-d]imidazole (**a3**):

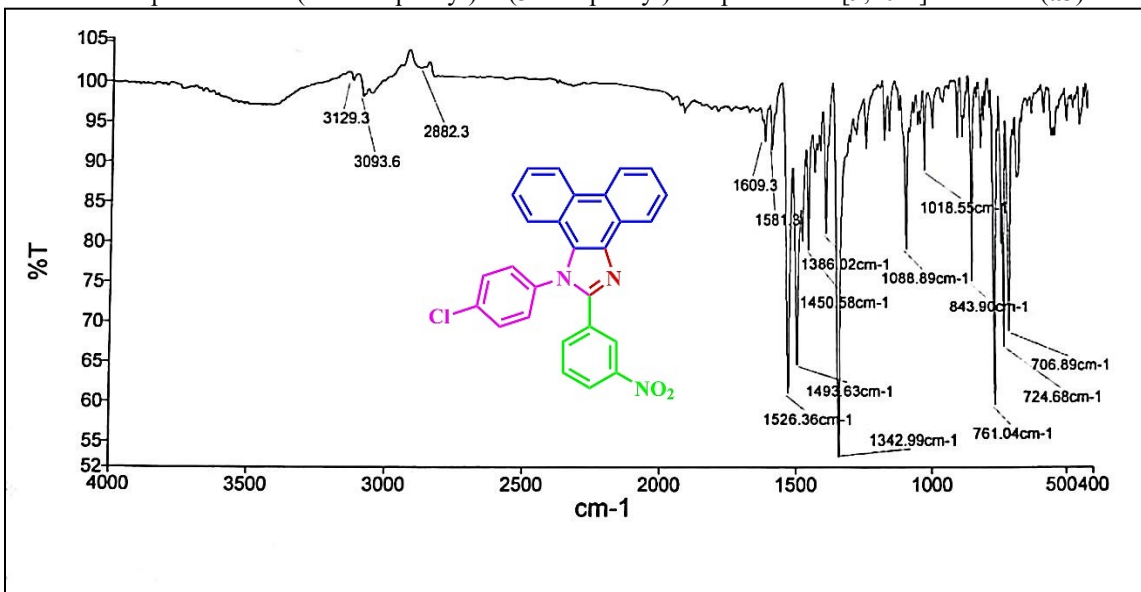

<sup>1</sup>HNMR spectrum of 1-(4-chlorophenyl)-2-(3-nitrophenyl)-1H-phenanthro[9,10-d]imidazole (**a3**):

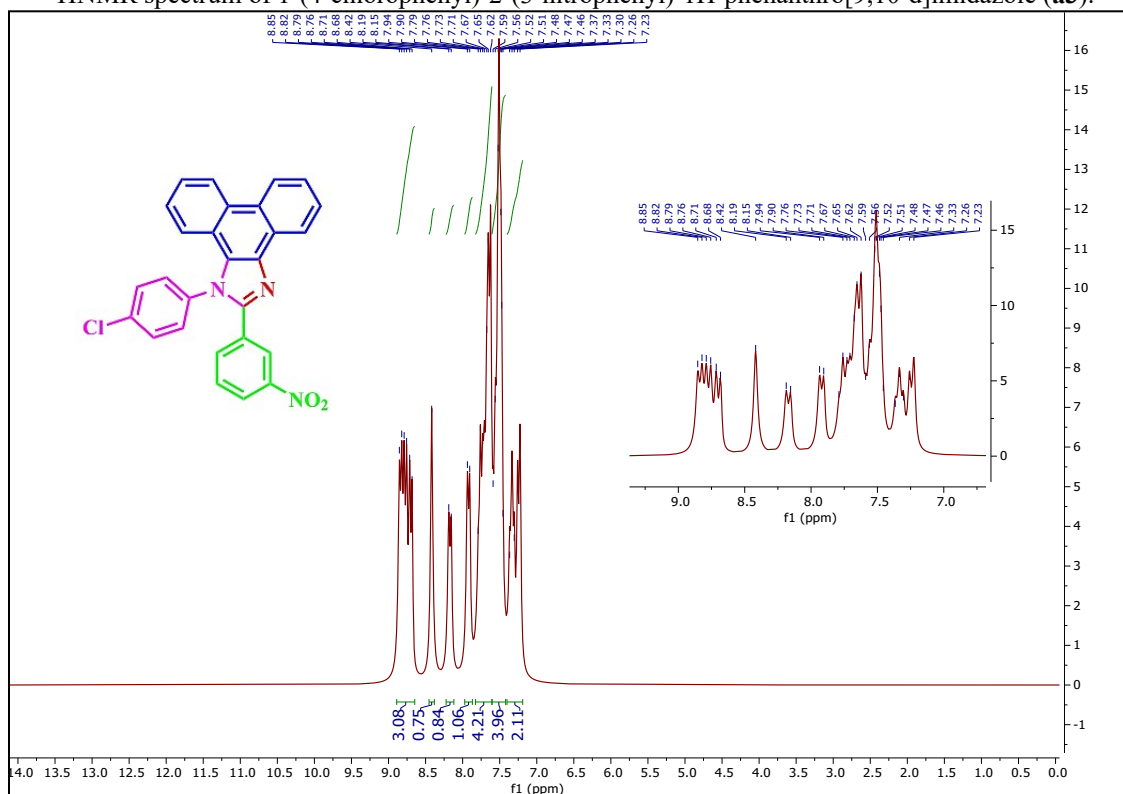

$^{13}\text{C}$ NMR spectrum of 1-(4-chlorophenyl)-2-(3-nitrophenyl)-1H-phenanthro[9,10-d]imidazole (**a3**):

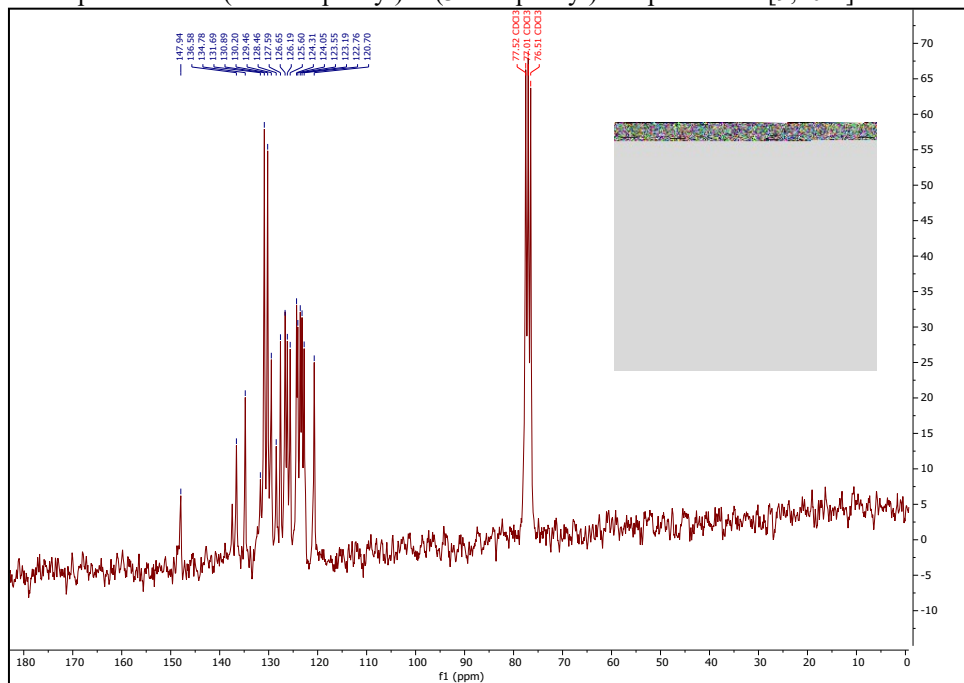

Mass spectrum of 1-(4-chlorophenyl)-2-(3-nitrophenyl)-1H-phenanthro[9,10-d]imidazole (**a3**):

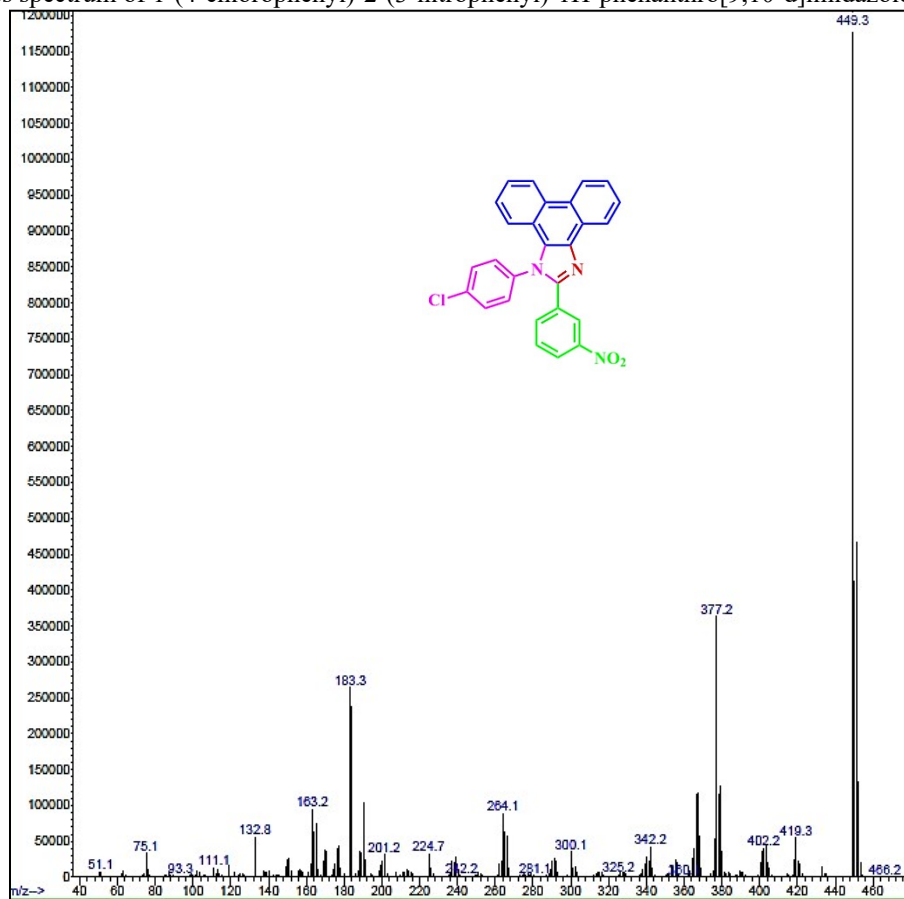

FT-IR spectrum of 1-(4-chlorophenyl)-2-(p-tolyl)-1H-phenanthro[9,10-d]imidazole (**a4**):

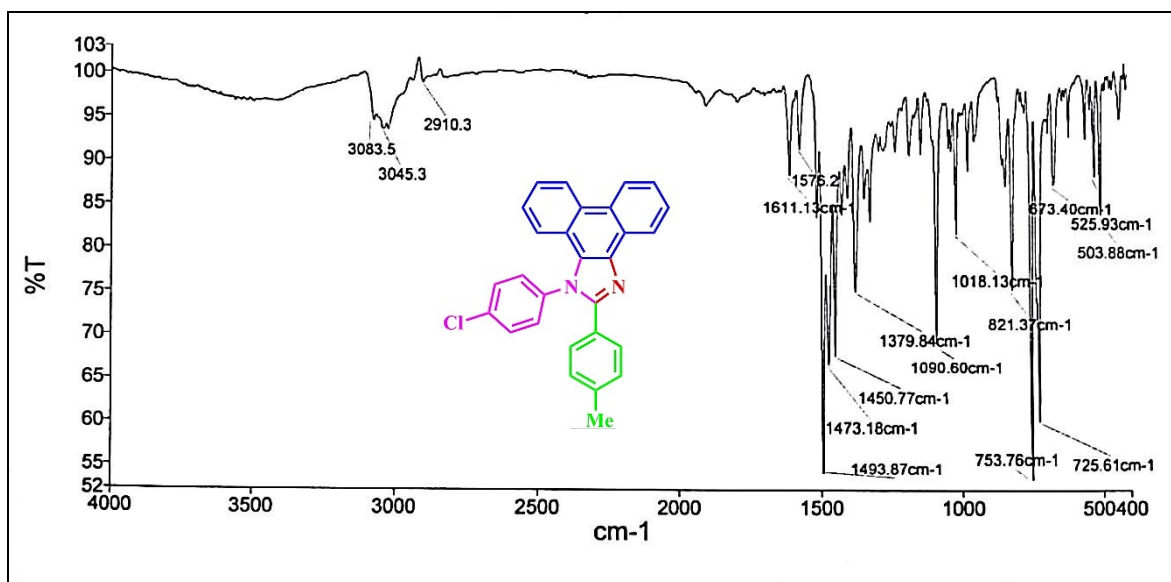

<sup>1</sup>H NMR spectrum of 1-(4-chlorophenyl)-2-(p-tolyl)-1H-phenanthro[9,10-d]imidazole (**a4**):

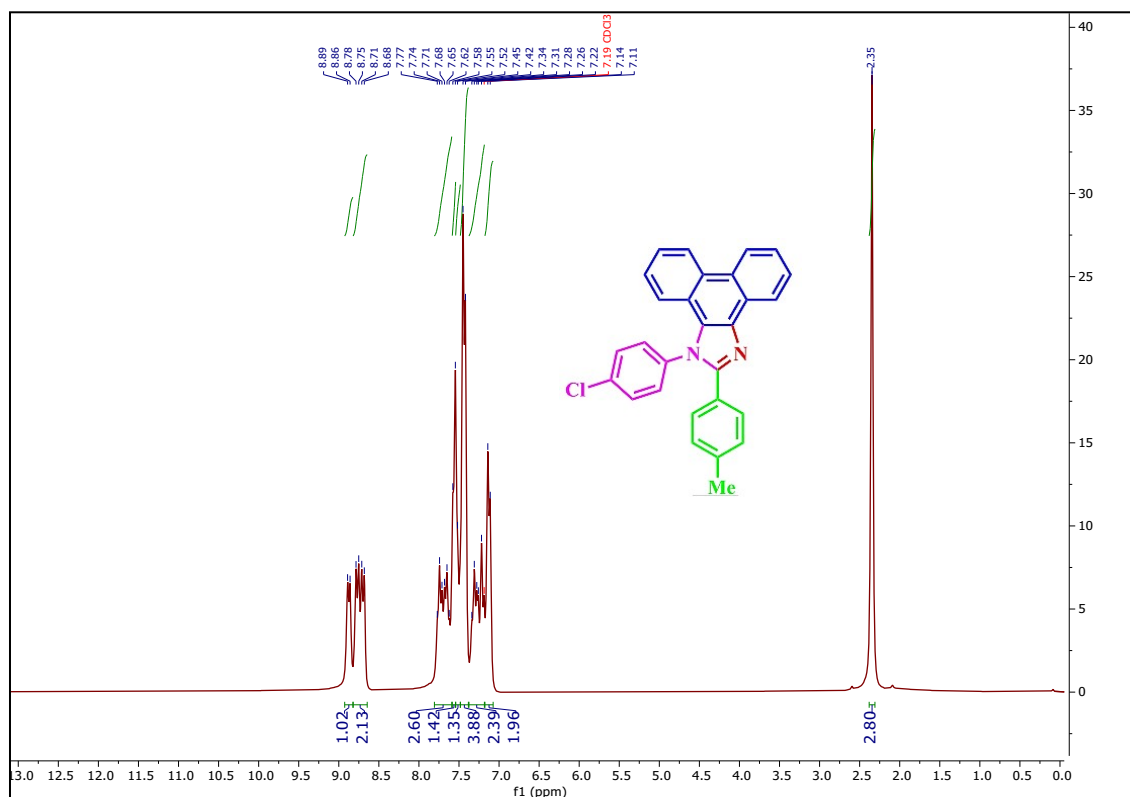



$^{13}\text{C}$ NMR spectrum of 1-(4-chlorophenyl)-2-(p-tolyl)-1H-phenanthro[9,10-d]imidazole (**a4**):

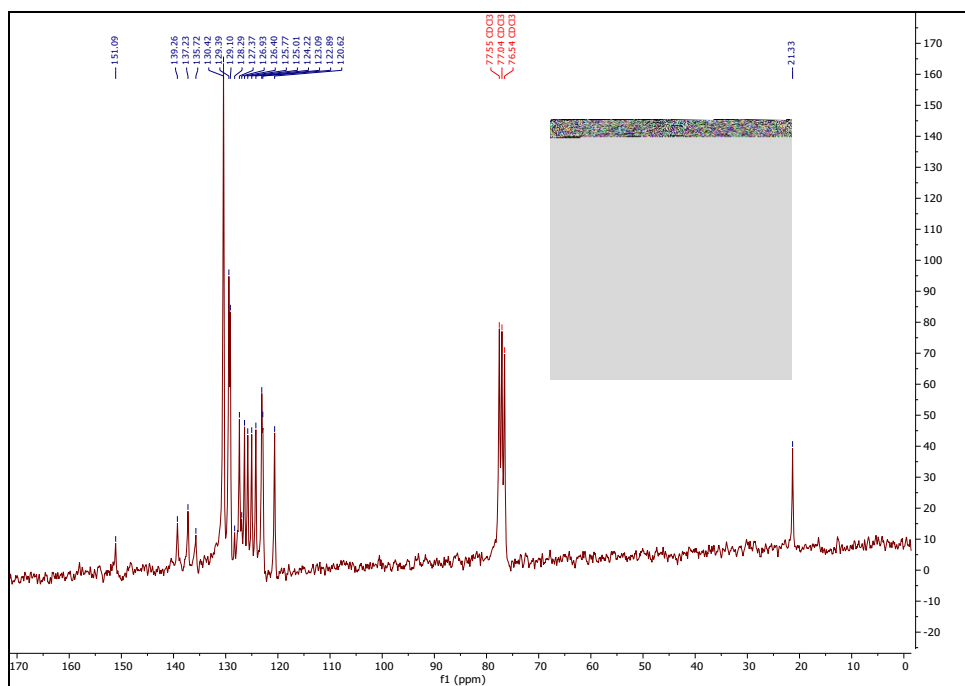

Mass spectrum of 1-(4-chlorophenyl)-2-(p-tolyl)-1H-phenanthro[9,10-d]imidazole (**a4**):

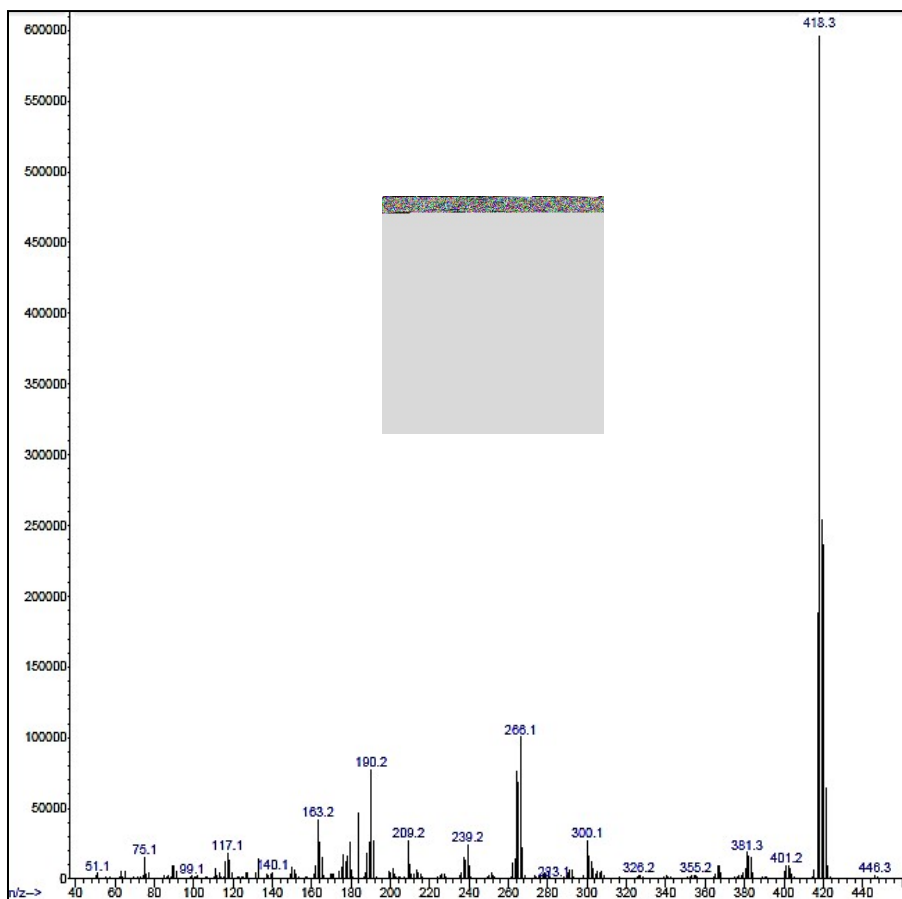

FT-IR spectrum of 2-(4-isopropylphenyl)-1-phenyl-1H-phenanthro[9,10-d]imidazole (**a5**):

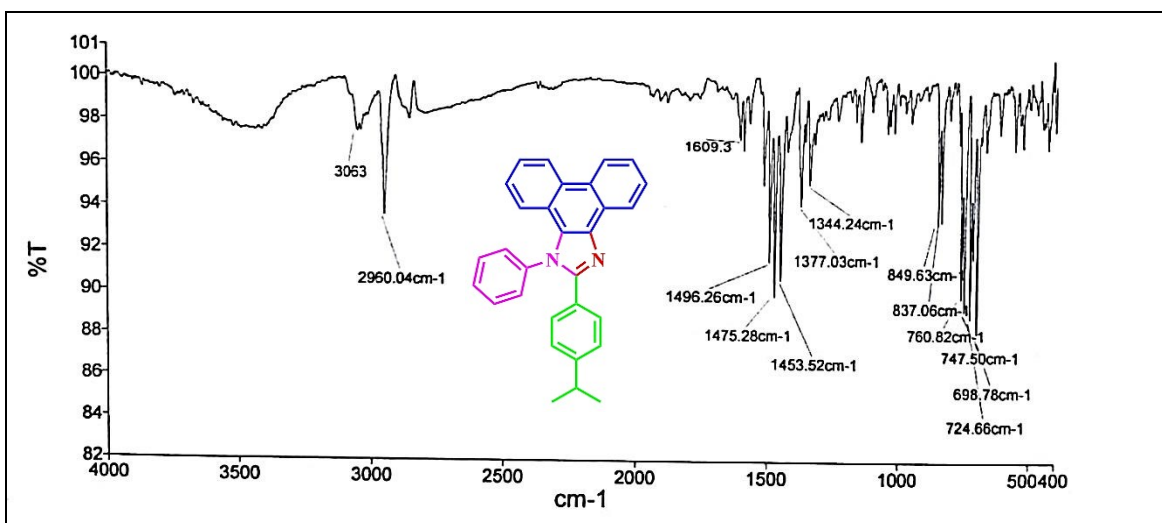

$^1\text{H}$ NMR spectrum of 2-(4-isopropylphenyl)-1-phenyl-1H-phenanthro[9,10-d]imidazole (**a5**):

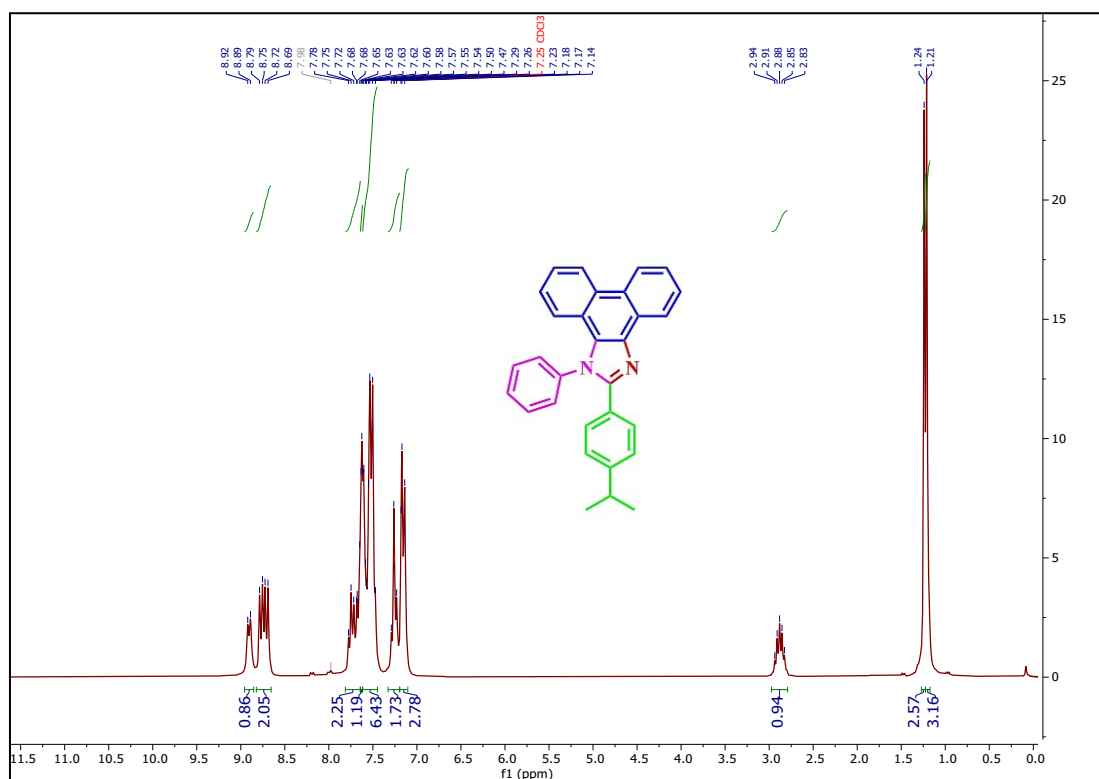

<sup>13</sup>CNMR spectrum of 2-(4-isopropylphenyl)-1-phenyl-1H-phenanthro[9,10-d]imidazole (**a5**):

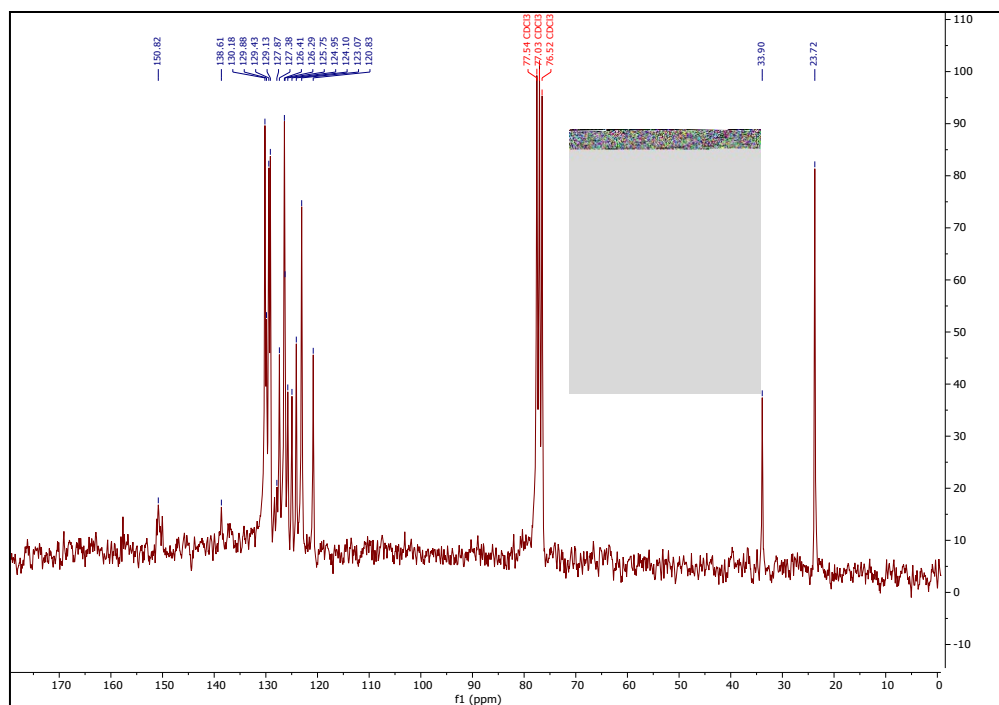

Mass spectrum of 2-(4-isopropylphenyl)-1-phenyl-1H-phenanthro[9,10-d]imidazole (**a5**):

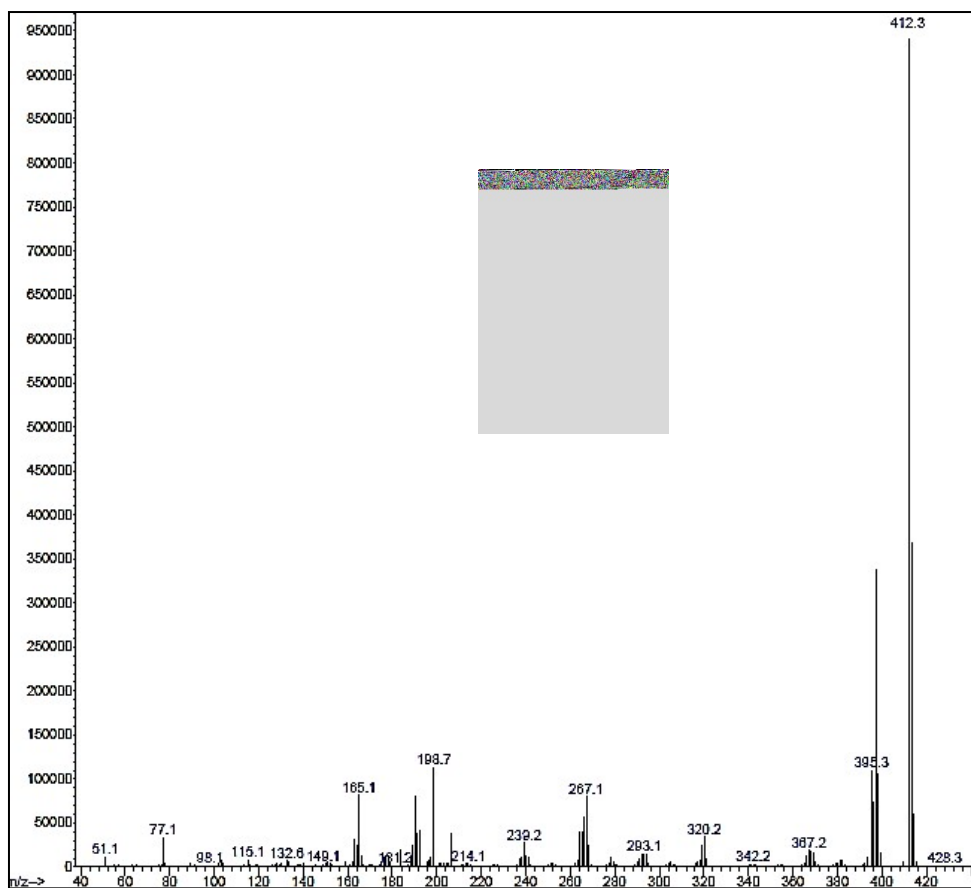

FT-IR spectrum of 1-(4-chlorophenyl)-2-(3,4-dimethoxyphenyl)-1H-phenanthro[9,10-d]imidazole (**a6**):

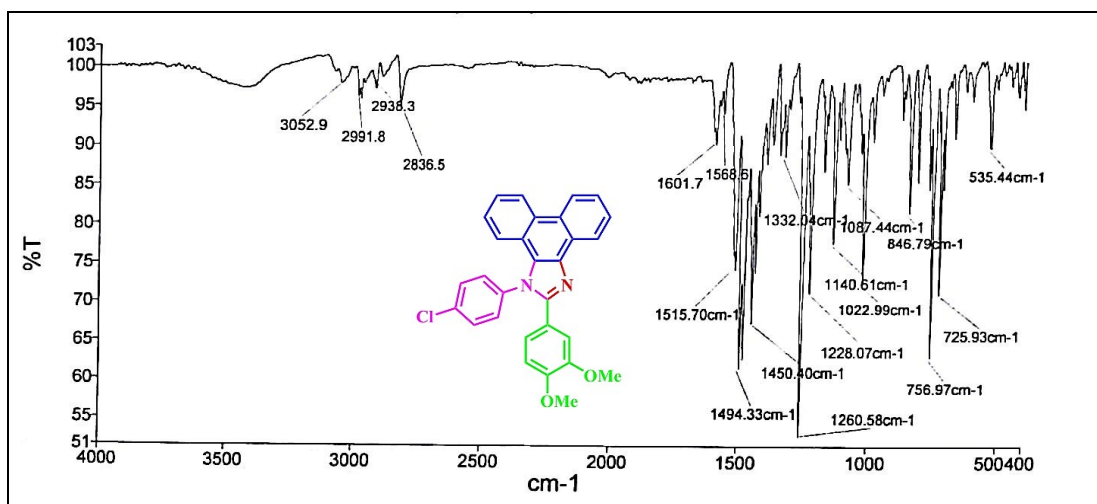

FT-IR spectrum of 1,2-diphenyl-1H-phenanthro[9,10-d]imidazole (**a7**):

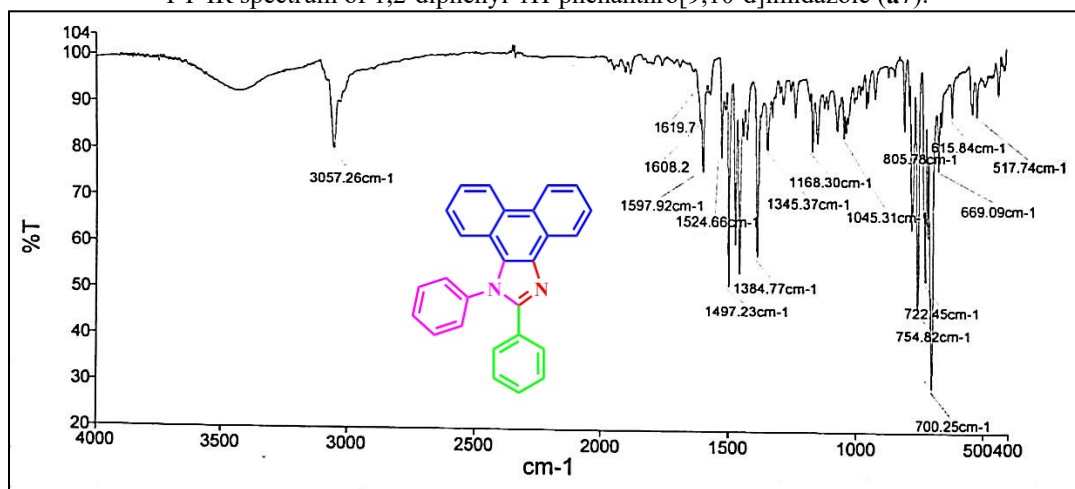

FT-IR spectrum of 2-(4-chlorophenyl)-1-phenyl-1H-phenanthro[9,10-d]imidazole (**a8**):

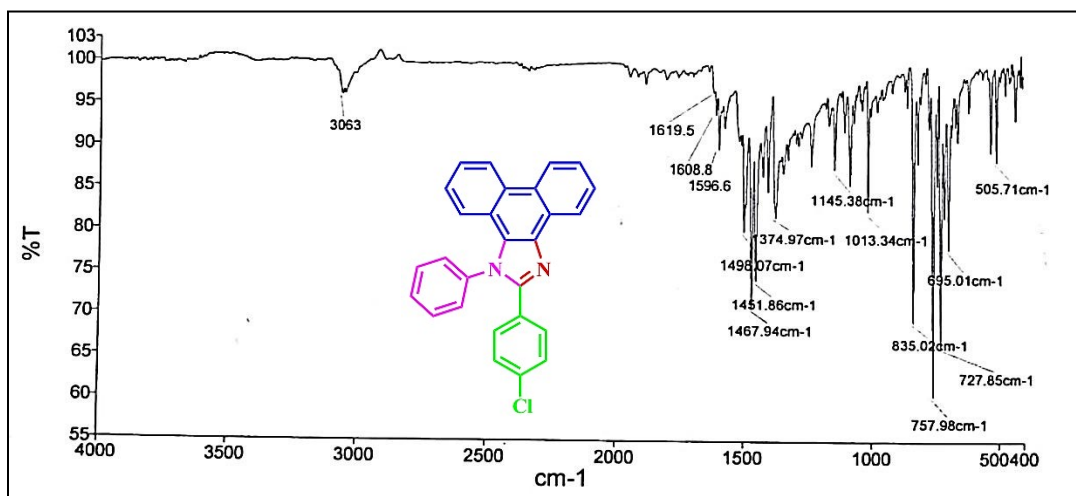

<sup>1</sup>HNMR spectrum of 2-(4-chlorophenyl)-1-phenyl-1H-phenanthro[9,10-d]imidazole (**a8**):

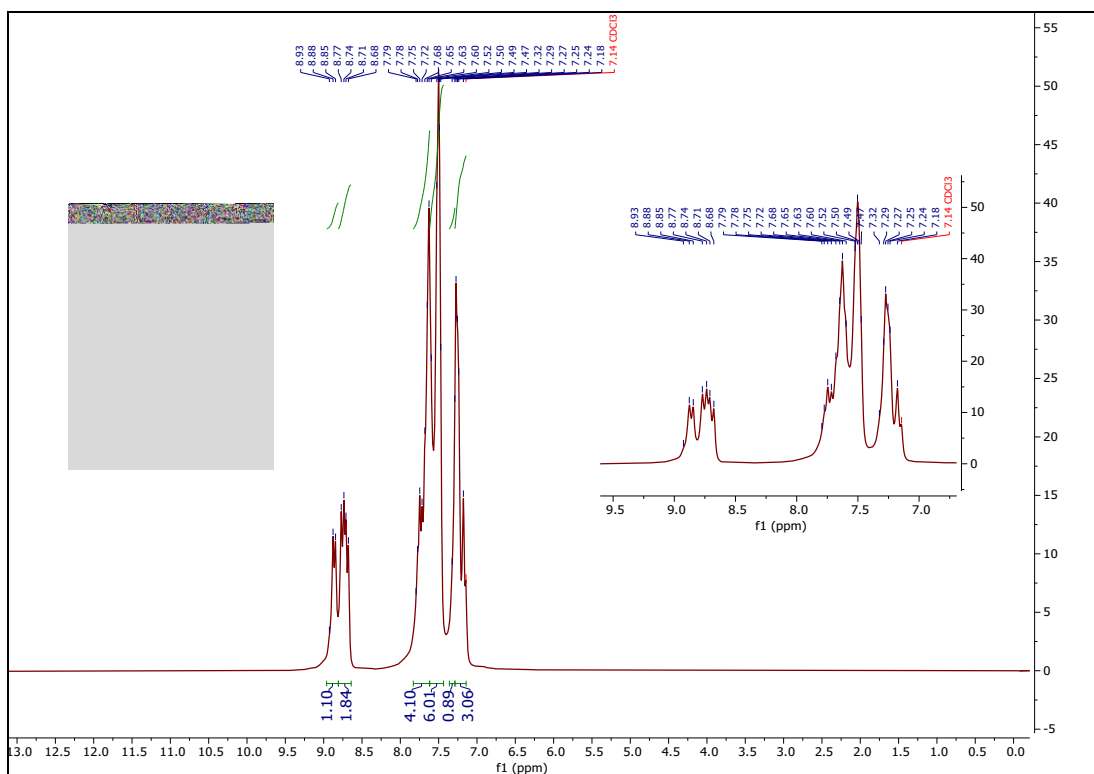

FT-IR spectrum of 1-phenyl-2-(p-tolyl)-1H-phenanthro[9,10-d]imidazole (**a9**):

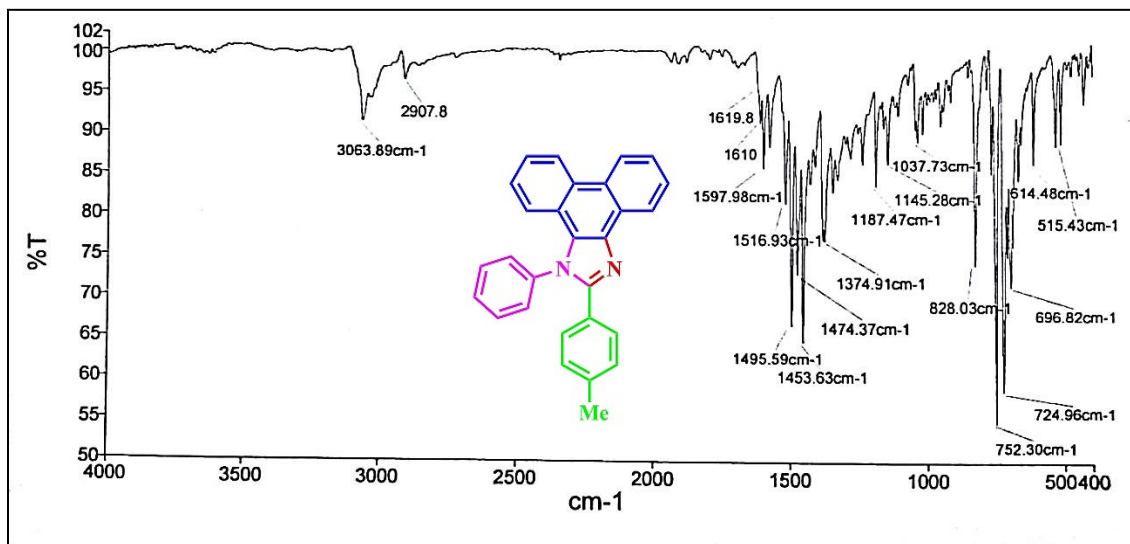

$^1\text{H}$ NMR spectrum of 1-phenyl-2-(p-tolyl)-1H-phenanthro[9,10-d]imidazole (**a9**):

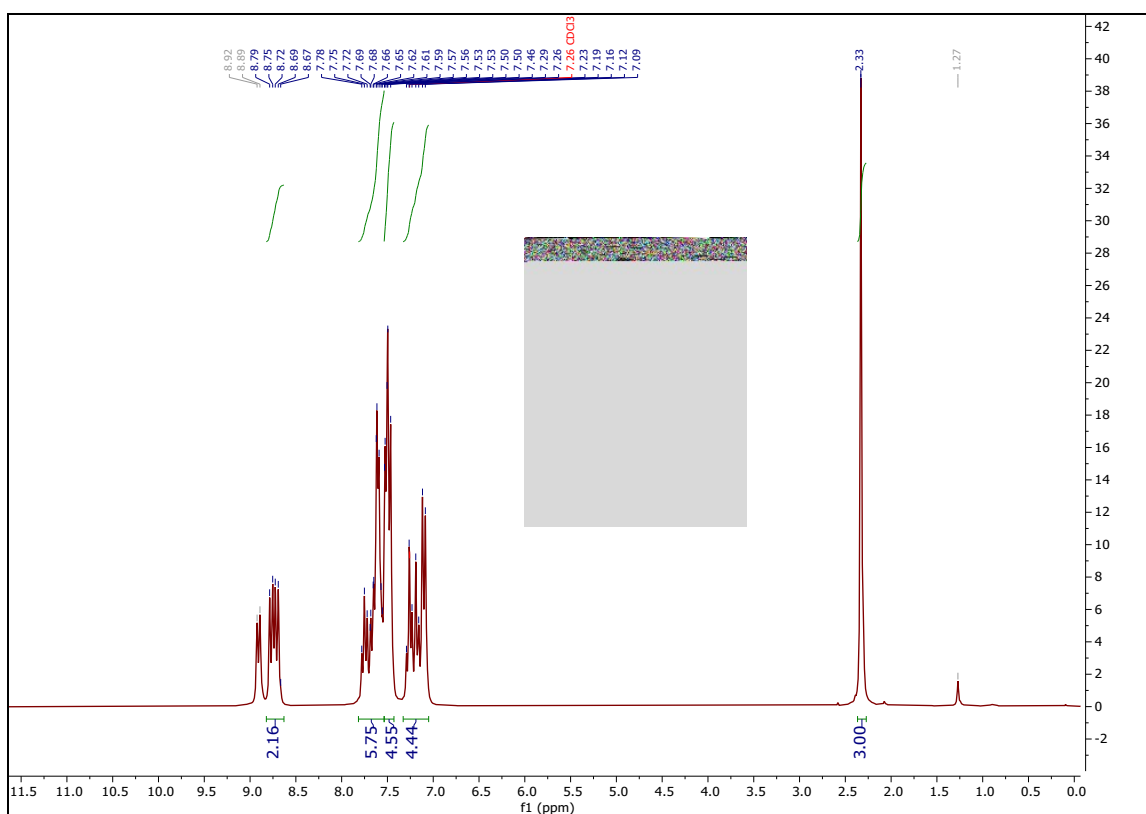

FT-IR spectrum of 1-(4-chlorophenyl)-2-phenyl-1H-phenanthro[9,10-d]imidazole (**a10**):

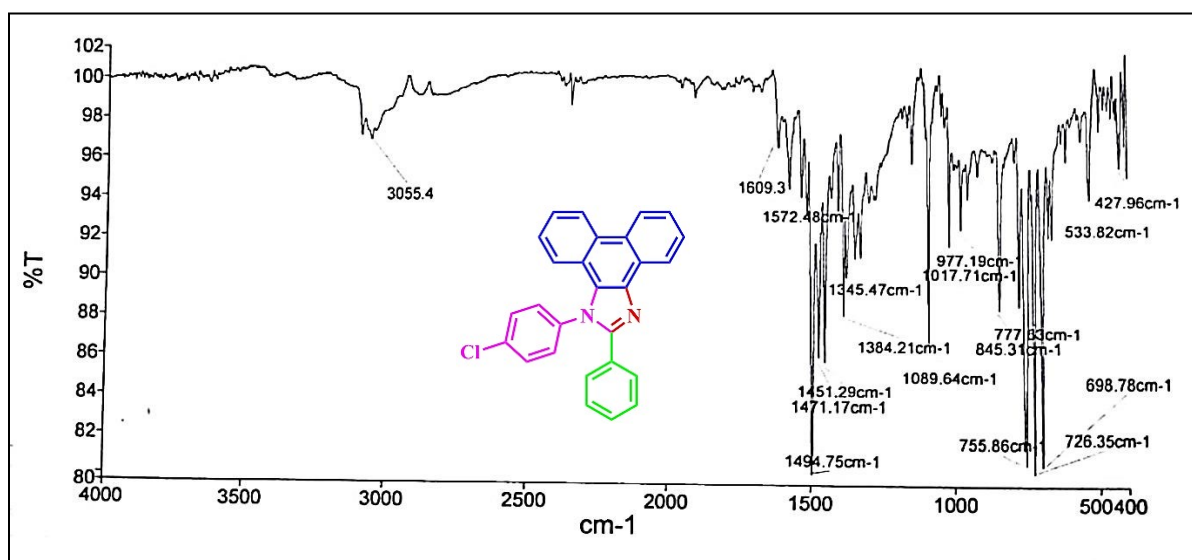

FT-IR spectrum of 1-(4-chlorophenyl)-2-(4-methoxyphenyl)-1H-phenanthro[9,10-d]imidazole (**a11**):

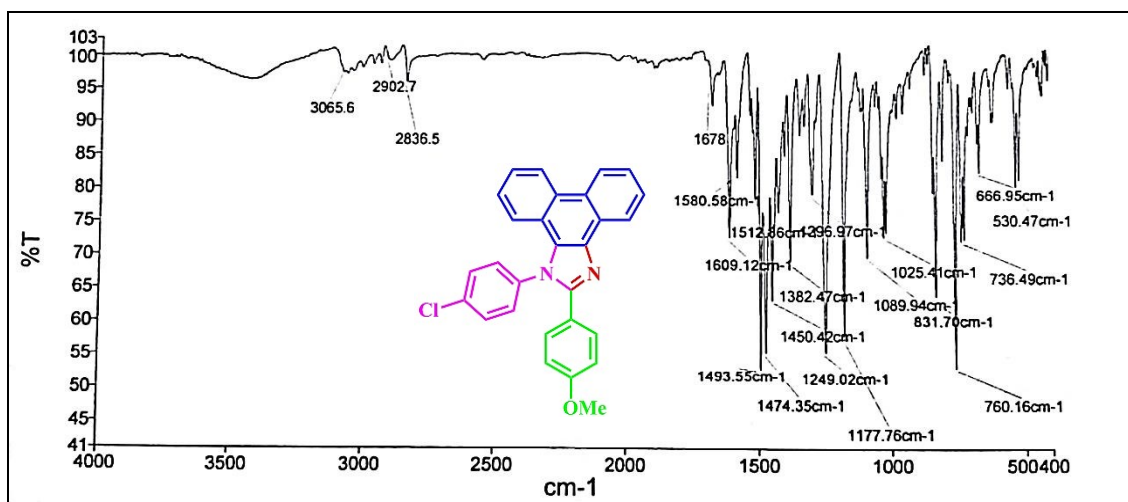

<sup>1</sup>H NMR spectrum of 1-(4-chlorophenyl)-2-(4-methoxyphenyl)-1H-phenanthro[9,10-d]imidazole (**a11**):

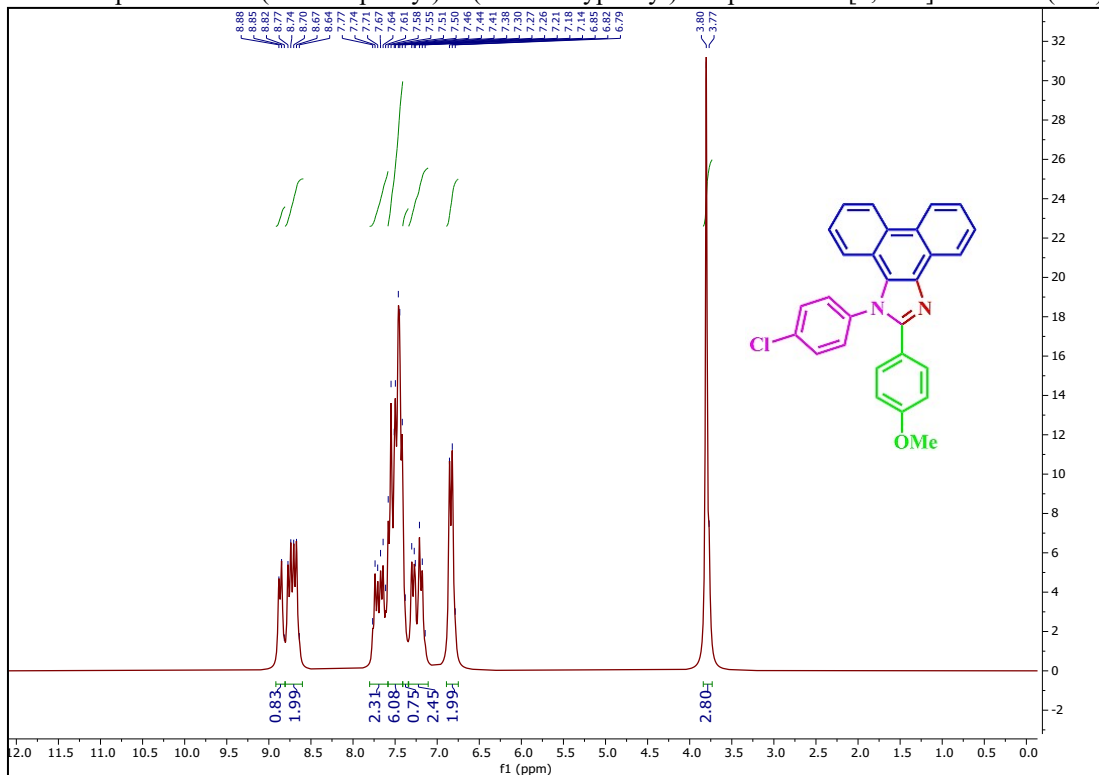

<sup>13</sup>CNMR spectrum of 1-(4-chlorophenyl)-2-(4-methoxyphenyl)-1*H*-phenanthro[9,10-*d*]imidazole (**a11**):

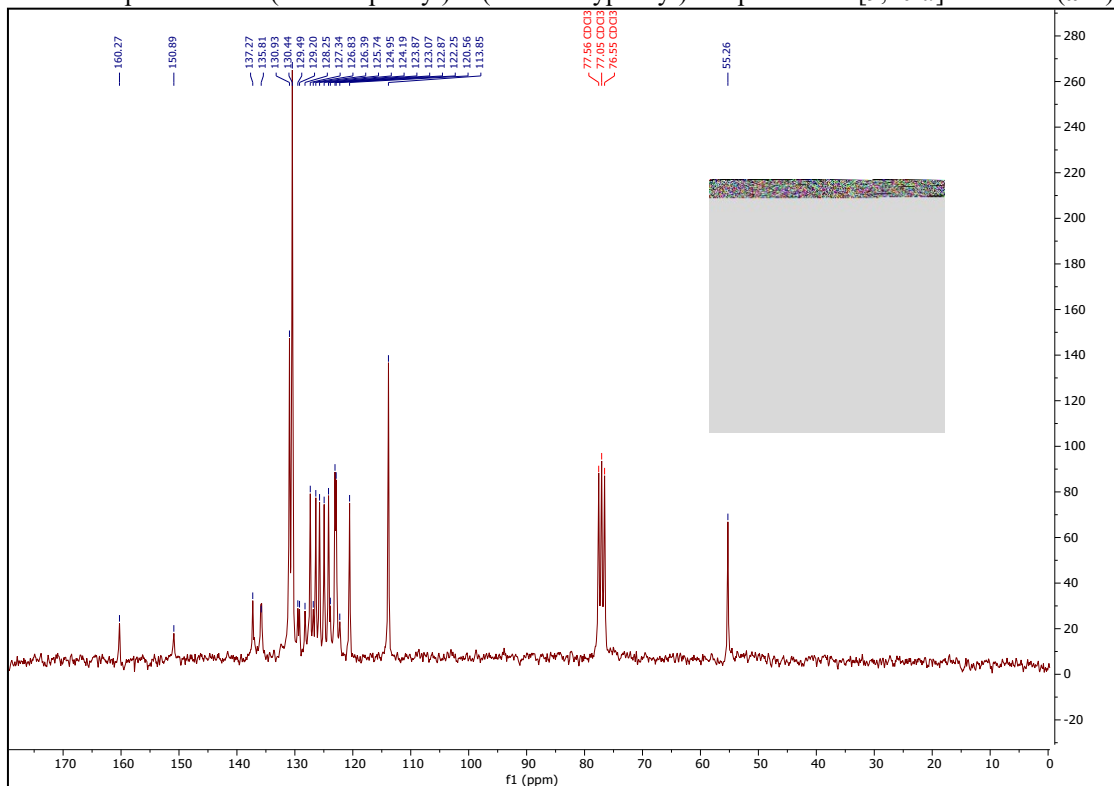

FT-IR spectrum of 4-(1-(4-chlorophenyl)-1*H*-phenanthro[9,10-*d*]imidazol-2-yl)-*N,N*-dimethylaniline (**a12**):

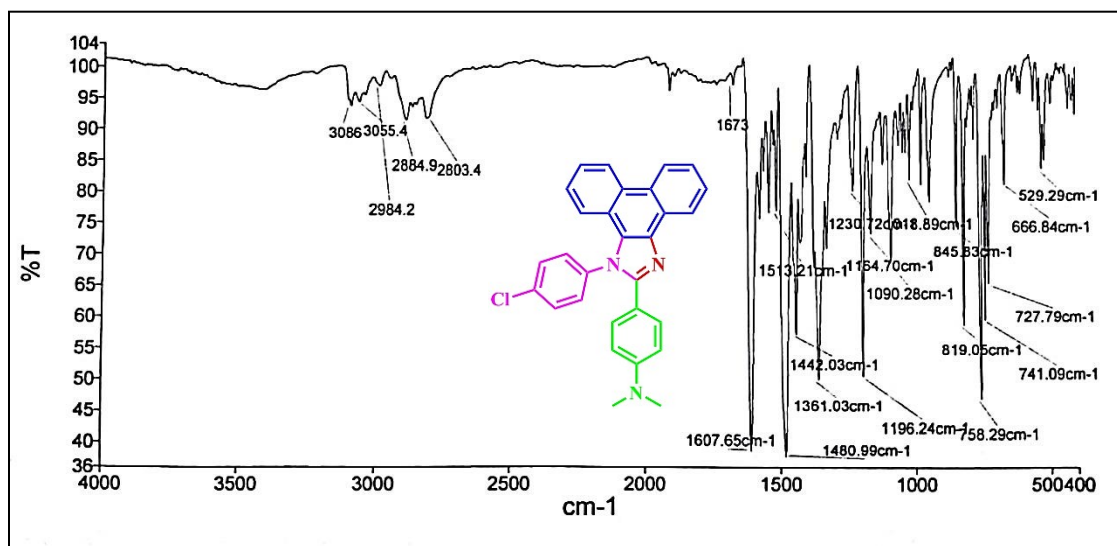

Supplement: d4ra03302g1.pdf [file d4ra03302g1.pdf]
